# Supplementary material for: Effect of composition gradient on domain structure and piezoelectric properties in Mn-doped KNN single crystals
Source: Royal Society of Chemistry journal article supplement (doi:10.1039/d2tc05312h), 2023-01-01
Supplement: d2tc05312h1.pdf [file d2tc05312h1.pdf]

## Supporting Information

### Effect of Composition Gradient on Domain Structure and Piezoelectric Properties in Mn-doped KNN Single Crystals

Yao Zhang,<sup>a</sup> Chengpeng Hu,<sup>\*a</sup> Yu Wang,<sup>\*a</sup> Xiaolin Huang,<sup>a</sup> Xuejie Sun,<sup>a</sup> Mingxuan Liu,<sup>a</sup> Bohan Xing,<sup>a</sup> Xing Wen,<sup>a</sup> and Hao Tian<sup>a,b,c,d</sup>

<sup>a</sup>School of Physics, Harbin Institute of Technology, Harbin 150001, China

<sup>b</sup>Key Laboratory of Micro-Nano Optoelectronic Information System, Ministry of Industry and Information Technology, Harbin 150001, China

<sup>c</sup>Collaborative Innovation Center of Extreme Optics, Shanxi University, Taiyuan, Shanxi 030006, China

<sup>d</sup>Heilongjiang Provincial Key Laboratory of Plasma Physics and Application Technology, Harbin 150001, China

\*Corresponding Author:huchengpeng1988@163.com and wangyuphysics@hit.edu.cn

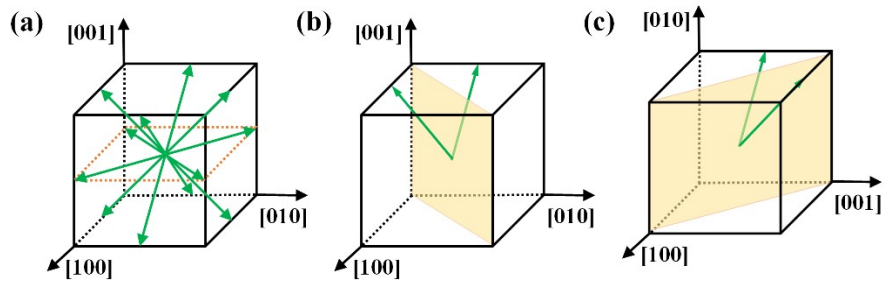

Figure S1. The spontaneous polarization of KNN single crystal at orthogonal phase. (a). A schematic of the domain wall of orthorhombic phase domains was observed from  $[001]_c$  (b) and  $[010]_c$  (c).

Table S1 The Composition gradients of Mn: KNN single crystals.

| point     | Na (At %) | K (At%) | Na/(Na+K) | $CG = \frac{( c-a + d-b )}{2 \cdot \Delta l}$ (mol% mm <sup>-1</sup> ) |       |
|-----------|-----------|---------|-----------|------------------------------------------------------------------------|-------|
| $[001]_c$ | a         | 12.64   | 13.36     | 0.486                                                                  | 0.005 |
|           | c         | 12.94   | 13.42     | 0.491                                                                  |       |
|           | b         | 12.64   | 13.31     | 0.487                                                                  |       |
|           | d         | 12.71   | 13.14     | 0.492                                                                  |       |
| $[010]_c$ | a         | 12.44   | 13.32     | 0.483                                                                  | 0.018 |
|           | c         | 12.05   | 13.84     | 0.465                                                                  |       |
|           | b         | 12.64   | 13.10     | 0.491                                                                  |       |
|           | d         | 12.38   | 13.79     | 0.473                                                                  |       |

Note: At% is the atomic percentage.
